# Supplementary material for: A recurrent mutation in the BMP type I receptor ACVR1 causes inherited and sporadic fibrodysplasia ossificans progressiva
Source: Springer Nature journal article supplement (doi:10.1038/ng1783), 2006-04-23
Supplement: 41588_2006_BFng1783_MOESM1_ESM.pdf [file 41588_2006_BFng1783_MOESM1_ESM.pdf]

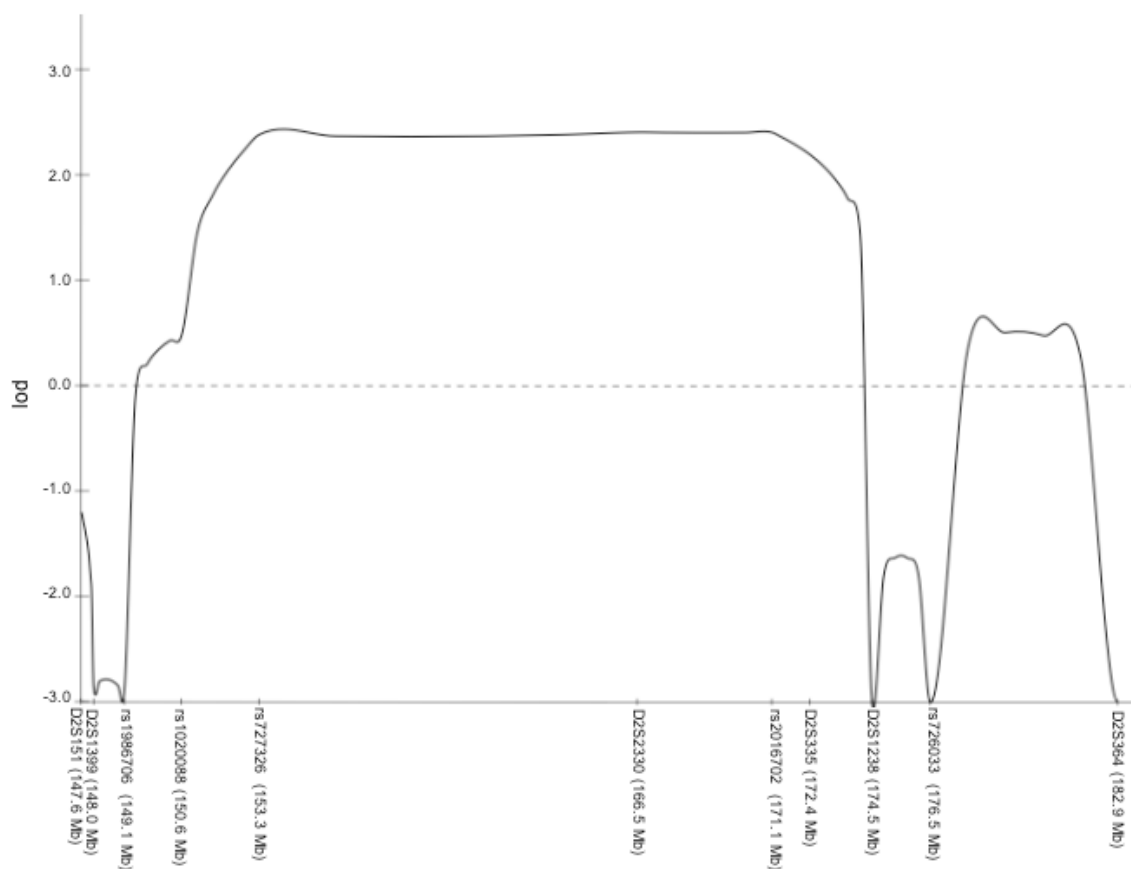

**Supplementary Figure 1.** Combined multipoint lod plot for markers in the chromosome 2 FOP linkage region. Data was generated from the FOP families represented in Figure 1c. Markers (shown in Fig. 1c) are on the X-axis at approximate relative distances measured in megabases (Mb). Marker positions were obtained from the UCSC GenomeBrowser.
