# Supplementary material for: A recurrent mutation in the BMP type I receptor ACVR1 causes inherited and sporadic fibrodysplasia ossificans progressiva
Source: Springer Nature journal article supplement (doi:10.1038/ng1783), 2006-04-23
Supplement: 41588_2006_BFng1783_MOESM3_ESM.pdf [file 41588_2006_BFng1783_MOESM3_ESM.pdf]

**Supplementary Table 1.** ACVR1 primers for genomic DNA PCR amplification.

| <b>Protein coding exon #</b> | <b>Forward primer</b>        | <b>Reverse primer</b>        | <b>PCR product size</b> |
|------------------------------|------------------------------|------------------------------|-------------------------|
| Exon 1                       | 5'-GGCAGTTTGAAGGTGGTATG-3'   | 5'-ACCCAAAAAGATGTGAGTCAC-3'  | 184bp                   |
|                              |                              |                              |                         |
| Exon 2                       | 5'-ATATGAACACCACAGGGG-3'     | 5'-CCTTTCTGGTAGACGTGGAAG-3'  | 449bp                   |
|                              | 5'-TTTTTCCCCTTCCTTCTCTC-3'   | 5'-CAGGGTGACCTTCCTTGTAG-3'   | 438bp                   |
|                              |                              |                              |                         |
| Exon 3                       | 5'-AATTCCCCCTTTCCCTCCAAC-3'  | 5'-TAAGAACGTGTCTCCAGACACC-3' | 300bp                   |
|                              |                              |                              |                         |
| Exon 4                       | 5'-CCAGTCCTTCTCCTTCTTCC-3'   | 5'-AGCAGATTTCCAAGTTCCATC-3'  | 350bp                   |
|                              |                              |                              |                         |
| Exon 5                       | 5'-TCCCAAGCTGAGTTTCTCC-3'    | 5'-AGAGCAAAGGCAGACAATTG-3'   | 346bp                   |
|                              |                              |                              |                         |
| Exon 6                       | 5'-GACATTTACTGTGTAGGTCGC-3'  | 5'-AGAGATGCAACTCACCTAACC-3'  | 438bp                   |
|                              |                              |                              |                         |
| Exon 7                       | 5'-TGGGGTTGGTTTAAAATCCTTC-3' | 5'-AGGTAGCTGGATCAAGAGAAC-3'  | 337bp                   |
|                              |                              |                              |                         |
| Exon 8                       | 5'-CACATTATAACCTGTGACACCC-3' | 5'-ATACCAGTTGAAACTCAAAGGG-3' | 299bp                   |
|                              |                              |                              |                         |
| Exon 9                       | 5'-GTATTGCTGCTTTTGGCAC-3'    | 5'-CAGTCCCTACCTTTGCAAC-3'    | 700bp                   |
|                              |                              |                              |                         |

Protein coding exon 1 contains the ATG protein start codon. The R206H mutation is in protein coding exon 4.
